## 1 **The landscape of antibody binding to SARS-CoV-2**

2 Anna S. Heffron<sup>1</sup>, Sean J. McIlwain<sup>2,3</sup>, David A. Baker<sup>1</sup>, Maya F. Amjadi<sup>4</sup>, Saniya Khullar<sup>2</sup>,  
3 Ajay K. Sethi<sup>5</sup>, Miriam A. Shelef<sup>4,6</sup>, David H. O'Connor<sup>1,7</sup>, Irene M. Ong<sup>2,3,8\*</sup>

4  
5 <sup>1</sup>Department of Pathology and Laboratory Medicine, University of Wisconsin-Madison,  
6 Madison, WI, United States of America

7 <sup>2</sup>Department of Biostatistics and Medical Informatics, University of Wisconsin-Madison,  
8 Madison, WI, United States of America

9 <sup>3</sup>University of Wisconsin Carbone Comprehensive Cancer Center, University of Wisconsin-  
10 Madison, Madison, WI, United States of America

11 <sup>4</sup>Department of Medicine, University of Wisconsin-Madison, Madison, WI, United States of  
12 America

13 <sup>5</sup>Department of Population Health Sciences, University of Wisconsin-Madison, Madison, WI,  
14 United States of America

15 <sup>6</sup>William S. Middleton Memorial Veterans Hospital, Madison, WI, United States of America

16 <sup>7</sup>Wisconsin National Primate Research Center, University of Wisconsin-Madison, Madison,  
17 Wisconsin, United States of America

18 <sup>8</sup>Department of Obstetrics and Gynecology, University of Wisconsin-Madison, Madison, WI,  
19 United States of America

20

21 \*Corresponding author

22

### 23 **Abstract**

24 The search for potential antibody-based diagnostics, vaccines, and therapeutics for pandemic  
25 severe acute respiratory syndrome coronavirus 2 (SARS-CoV-2) has focused almost exclusively  
26 on the spike (S) and nucleocapsid (N) proteins<sup>1-8</sup>. Coronavirus membrane (M), orf3a, and orf8  
27 proteins are also humoral immunogens in other coronaviruses (CoVs)<sup>8-11</sup> but remain largely  
28 uninvestigated for SARS-CoV-2. Here we show that SARS-CoV-2 infection induces robust  
29 antibody responses to epitopes throughout the SARS-CoV-2 proteome, particularly in M, in  
30 which one epitope achieved near-perfect diagnostic accuracy. We map 79 B cell epitopes  
31 throughout the SARS-CoV-2 proteome and demonstrate that anti-SARS-CoV-2 antibodies  
32 appear to bind homologous peptide sequences in the 6 known human CoVs. Our results  
33 demonstrate previously unknown, highly reactive B cell epitopes throughout the full proteome of  
34 SARS-CoV-2 and other CoV proteins, especially M, which should be considered in diagnostic,  
35 vaccine, and therapeutic development.

36

### 37 **Introduction**

38 Antibodies mediate protection from coronaviruses (CoVs) including SARS-CoV-2<sup>1-8</sup>, severe  
39 acute respiratory syndrome coronavirus (SARS-CoV)<sup>8,12-15</sup> and Middle Eastern respiratory  
40 syndrome coronavirus (MERS-CoV)<sup>8,16-19</sup>. All CoVs encode 4 main structural proteins, spike  
41 (S), envelope (E), membrane (M), and nucleocapsid (N), as well as multiple non-structural  
42 proteins and accessory proteins<sup>20</sup>. In SARS-CoV-2, anti-S and anti-N antibodies have received  
43 the most attention to date<sup>1-8</sup>, including in serology-based diagnostic tests<sup>1-5</sup> and vaccine  
44 candidates<sup>6-8</sup>. However, anti-S antibodies have been linked to antibody dependent enhancement  
45 for SARS-CoV-2 and other CoVs<sup>7,21-26</sup>, and prior reports observed that not all individuals  
46 infected with SARS-CoV-2 produce detectable antibodies against S or N<sup>1-5</sup>, indicating a need for

47 expanded antibody-based options. Much less is known about antibody responses to other SARS-  
48 CoV-2 proteins, though data from other CoVs suggest they may be important. Antibodies against  
49 SARS-CoV M can be more potent than antibodies against SARS-CoV S<sup>9-11</sup>, and some  
50 experimental SARS-CoV and MERS-CoV vaccines elicit responses to M, E, and orf8<sup>8</sup>.  
51 Additionally, previous work has demonstrated humoral cross-reactivity between CoVs<sup>7,14,27-30</sup>  
52 and suggested it could be protective<sup>24,30</sup>, although full-proteome cross-reactivity has not been  
53 investigated. We designed a peptide microarray tiling the proteome of SARS-CoV-2 and 8 other  
54 human and animal CoVs in order to assess antibody epitope specificity and potential cross-  
55 reactivity with other CoVs, and we used this microarray to profile IgG antibody responses in 40  
56 COVID-19 convalescent patients and 20 SARS-CoV-2-naïve controls.

57

### 58 **CoV reactivity in uninfected controls**

59 Greater than 90% of adult humans are seropositive for the “common cold” CoVs (CCCoVs:  
60 HCoV-HKU1, HCoV-OC43, HCoV-NL63, and HCoV-229E)<sup>31,32</sup>, but it is unknown how these  
61 pre-existing antibodies might affect reactivity to SARS-CoV-2 or other CoVs. We measured IgG  
62 reactivity in sera from 20 SARS-CoV-2-naïve control subjects to CoV linear peptides,  
63 considering reactivity that was >3 standard deviations above the mean for the log<sub>2</sub>-quantile  
64 normalized array data to be indicative of antibody binding. All sera exhibited binding in known  
65 epitopes of at least 1 of the control non-CoV strains (poliovirus vaccine and rhinovirus; Fig. 1,  
66 Extended data 1, Extended data 2) and were collected in Wisconsin, USA, where exposure to  
67 SARS-CoV or MERS-CoV was extremely unlikely. We found that at least one epitope in  
68 structural or accessory proteins had binding in 100% of controls for HCoV-HKU1, 85% of  
69 controls for HCoV-OC43, 65% for HCoV-NL63, and 55% for HCoV-229E (Fig. 2, Extended  
70 data 2). Apparent cross-reactive binding was observed in 45% of controls for MERS-CoV, 50%  
71 for SARS-CoV, and 50% for SARS-CoV-2.

72

### 73 **SARS-CoV-2 proteome humoral profiling**

74 We aimed to map the full extent of binding of antibodies induced by SARS-CoV-2 infection and  
75 to rank the identified epitopes in terms of likelihood of importance and immunodominance. We  
76 defined epitope recognition as antibody binding to contiguous peptides in which the average  
77 log<sub>2</sub>-normalized intensity for patients was at least 2-fold greater than for controls with *t*-test  
78 statistics yielding adjusted *p*-values <0.1. We chose these criteria, rather than the 3 standard  
79 deviation cut-off, in order to ensure that binding detected would be greater than background  
80 binding seen in controls (2-fold greater) and to remove regions of binding that were not at least  
81 weakly significantly different from controls (adjusted *p*<0.1). These criteria identified 79 B cell  
82 epitopes (Fig. 3, Extended data 3) in S, M, N, orf1ab, orf3a, orf6, and orf8. We ranked these  
83 epitopes by minimum adjusted *p*-value for any 16-mer in the epitope in order to determine the  
84 greatest likelihood of difference from controls as a proxy for immunodominance. The highest-  
85 ranking epitope occurred in the N-terminus of M (1-M-24). Patient sera showed high-magnitude  
86 reactivity (up to 6.7 fluorescence intensity units) in other epitopes in S, M, N, and orf3a, with  
87 lower-magnitude reactivity (<3.3 fluorescence intensity units) epitopes in other proteins. The  
88 epitopes with the greatest reactivity in S occurred in the fusion peptide (residues 788-806), with  
89 less reactivity in the receptor binding domain (residues 319-541)<sup>6</sup> (Fig. 3). Four detected  
90 epitopes (553-S-26, 624-S-23, 807-S-26, and 1140-S-25) have previously been shown to be  
91 potentially neutralizing<sup>33-35</sup>, and all 4 of these ranked within the top 10 epitopes. Forty-two of our  
92 detected epitopes (including 1-M-24, 553-S-26, 624-S-23, 807-S-26, and 1140-S-25; Extended

93 data 3) confirm bioinformatic predictions of antigenicity based on SARS-CoV and MERS-  
94 CoV<sup>7,8,36-38</sup>, with all top-ranking epitopes confirming bioinformatic predictions.

95  
96 The highest specificity (100%) and sensitivity (98%), determined by linear discriminant analysis  
97 leave-one-out cross-validation, for any individual peptide was observed for a 16-mer within the  
98 1-M-24 epitope: ITVEELKKLLEQWNLV (Extended data 4). Fifteen additional individual  
99 peptides in M, S, and N had 100% measured specificity and at least 80% sensitivity.

100 Combinations of 1-M-24 with 1 of 5 other epitopes (384-N-33, 807-S-26, 6057-orf1ab-17, 227-  
101 N-17, 4451-orf1b-16) yielded an area under the curve receiver operating characteristic of 1  
102 (Extended data 5) based on linear discriminant analysis leave-one-out-cross-validation.

103

#### 104 **Human, animal CoV cross-reactivity**

105 We defined cross-reactivity as binding by antibodies in COVID-19 convalescent sera to non-  
106 SARS-CoV-2 peptides at an average log<sub>2</sub>-normalized intensity at least 2-fold greater than in  
107 controls with *t*-test statistics yielding adjusted *p*-values <0.1. Antibodies in COVID-19-  
108 convalescent sera appeared to be cross-reactive with homologous epitopes in S, M, N, orf1ab,  
109 orf3, orf6, and orf8 in other CoVs (Fig. 4, Extended data 6, Extended data 7, Extended data 8).  
110 The greatest number of cross-reactive epitopes (70) were in the RaTG13 bat betacoronavirus ( $\beta$ -  
111 CoV), the closest known relative of SARS-CoV-2 (96% nucleotide identity)<sup>39,40</sup>, then the  
112 pangolin CoV (51 epitopes, 85% nucleotide identity with SARS-CoV-2)<sup>41</sup>, then SARS-CoV (40  
113 epitopes, 78% identity<sup>39</sup>). One region, corresponding to SARS-CoV-2 epitope 807-S-26, was  
114 cross-reactive across all CoVs, and one, corresponding to SARS-CoV-2 epitope 1140-S-25, was  
115 cross-reactive across all  $\beta$ -CoVs (Fig. 4). Epitope 807-S-26 includes the CoV S fusion peptide,  
116 and 1140-S-25 is immediately adjacent to the heptad repeat region 2, both of which are involved  
117 in membrane fusion<sup>42</sup>.

118

#### 119 **Discussion**

120 M proteins are the most abundant proteins in CoV virions<sup>20</sup>. The N-terminus of M is known in  
121 other CoVs to be a small, glycosylated ectodomain that protrudes outside the virion and interacts  
122 with S, N, and E<sup>20</sup>, while the rest of M resides within the viral particle. Full-length SARS-CoV  
123 M has been shown to induce protective antibodies<sup>11,43</sup>, and patterns of antibodies binding to  
124 SARS-CoV M are similar to those we found in SARS-CoV-2<sup>36</sup>. SARS-CoV anti-M antibodies  
125 can synergize with anti-S and anti-N antibodies<sup>11,43</sup>, and M has been used in protective SARS-  
126 CoV and MERS-CoV vaccines<sup>8</sup>. However, the mechanism of protection of anti-M antibodies  
127 remains unknown, and this protein remains largely understudied and underutilized as an antigen.  
128 Other groups have not previously identified the high magnitude binding we observed in M,  
129 though that may be due to using earlier sample timepoints or different techniques or  
130 algorithms<sup>44,45</sup>. Our results, in concert with prior knowledge of anti-SARS-CoV antibodies,  
131 strongly suggest that M, particularly the 1-M-24 epitope, as well as other novel epitopes that we  
132 identified should be investigated further as potential targets in SARS-CoV-2 diagnostics,  
133 vaccines, and therapeutics.

134

135 We also found that antibodies produced in response to SARS-CoV-2 infection appeared to cross-  
136 react with homologous epitopes throughout the proteomes of other human and non-human CoVs.  
137 Hundreds of CoVs have been discovered in bats and other species<sup>24,39-41,46,47</sup>, making future  
138 spillovers inevitable. The broad cross-reactivity we observed in some homologous peptide

139 sequences may help guide the development of pan-CoV vaccines<sup>18</sup>, especially given that  
140 antibodies binding to 807-S-26 and 1140-S-25, epitope motifs cross-reactive across all CoVs and  
141 all  $\beta$ -CoVs, respectively, are known to be potently neutralizing<sup>33,34</sup>. We cannot determine  
142 whether the increased IgG binding to CCCoVs in COVID-19 convalescent sera is due to newly  
143 developed cross-reactive antibodies or the stimulation of a memory response against the original  
144 CCCoV antigens. However, cross-reactivity of anti-SARS-CoV-2 antibodies with SARS-CoV or  
145 MERS-CoV is likely real, since our population was very unlikely to have been exposed to those  
146 viruses. A more stringent assessment of cross-reactivity as well as functional investigations into  
147 these cross-reactive antibodies will be vital in determining their capacity for cross-protection.  
148 Further, our methods efficiently detect antibody binding to linear epitopes<sup>48</sup>, but their sensitivity  
149 for detecting parts of conformational epitopes is unknown, and additional analyses will be  
150 required to determine whether epitopes identified induce neutralizing or otherwise protective  
151 antibodies.

152

153 Many questions remain regarding the biology and immunology of SARS-CoV-2. Our extensive  
154 profiling of epitope-level resolution antibody reactivity in COVID-19 convalescent subjects  
155 provides new epitopes that could serve as important targets in the development of improved  
156 diagnostics, vaccines, and therapeutics against SARS-CoV-2 and dangerous human CoVs that  
157 may emerge in the future.

158

159 **Figures**  
160

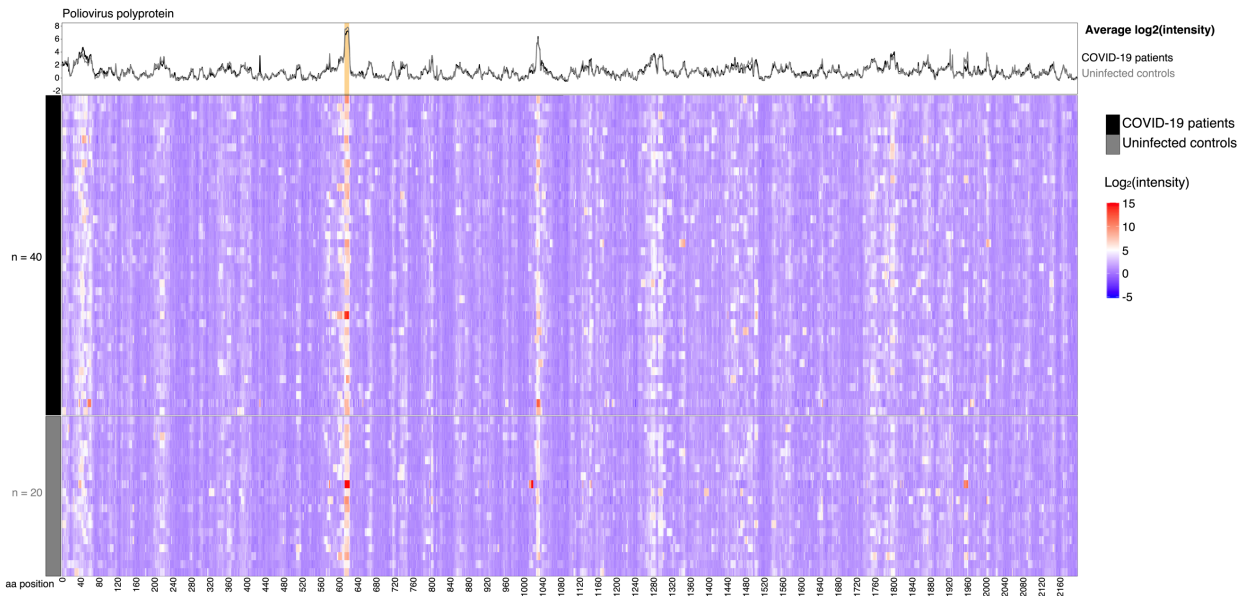

161 **Figure 1. Patients and control subjects show reactivity to a poliovirus control.** Sera from 20  
162 control subjects collected before 2019 were assayed for IgG binding to the full proteome of  
163 human poliovirus 1 on a peptide microarray. Binding was measured as reactivity that was >3  
164 standard deviations above the mean for the log<sub>2</sub>-quantile normalized array data. Patients and  
165 controls alike showed reactivity to a well-documented linear poliovirus epitope (start position  
166 613 [IEDB.org]; orange shading in line plot).  
167  
168

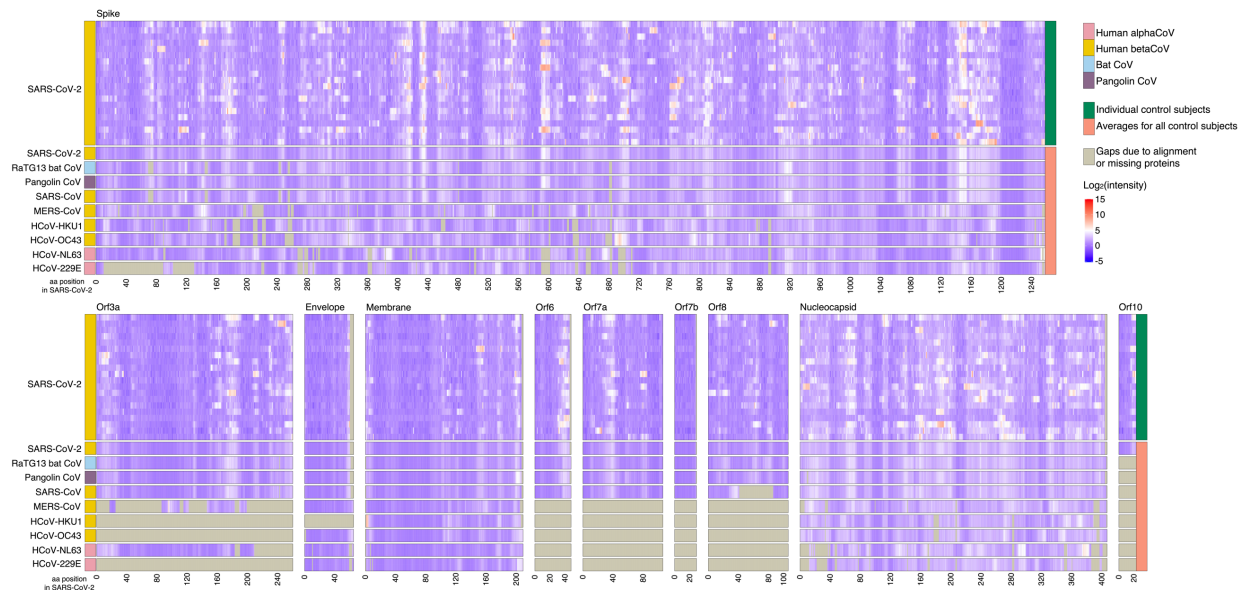

169 **Figure 2. Control sera show reactivity frequently to CCCoVs and rarely to SARS-CoV,**  
170 **MERS-CoV, and SARS-CoV-2.** Sera from 20 control subjects collected before 2019 were  
171 assayed for IgG binding to the full proteomes of 9 CoVs on a peptide microarray. Viral proteins  
172 are shown aligned to the SARS-CoV-2 proteome with each virus having an individual panel;  
173 SARS-CoV-2 amino acid (aa) position is represented on the x-axis. Binding was measured as  
174



175 reactivity that was >3 standard deviations above the mean for the log<sub>2</sub>-quantile normalized array  
176 data.  
177

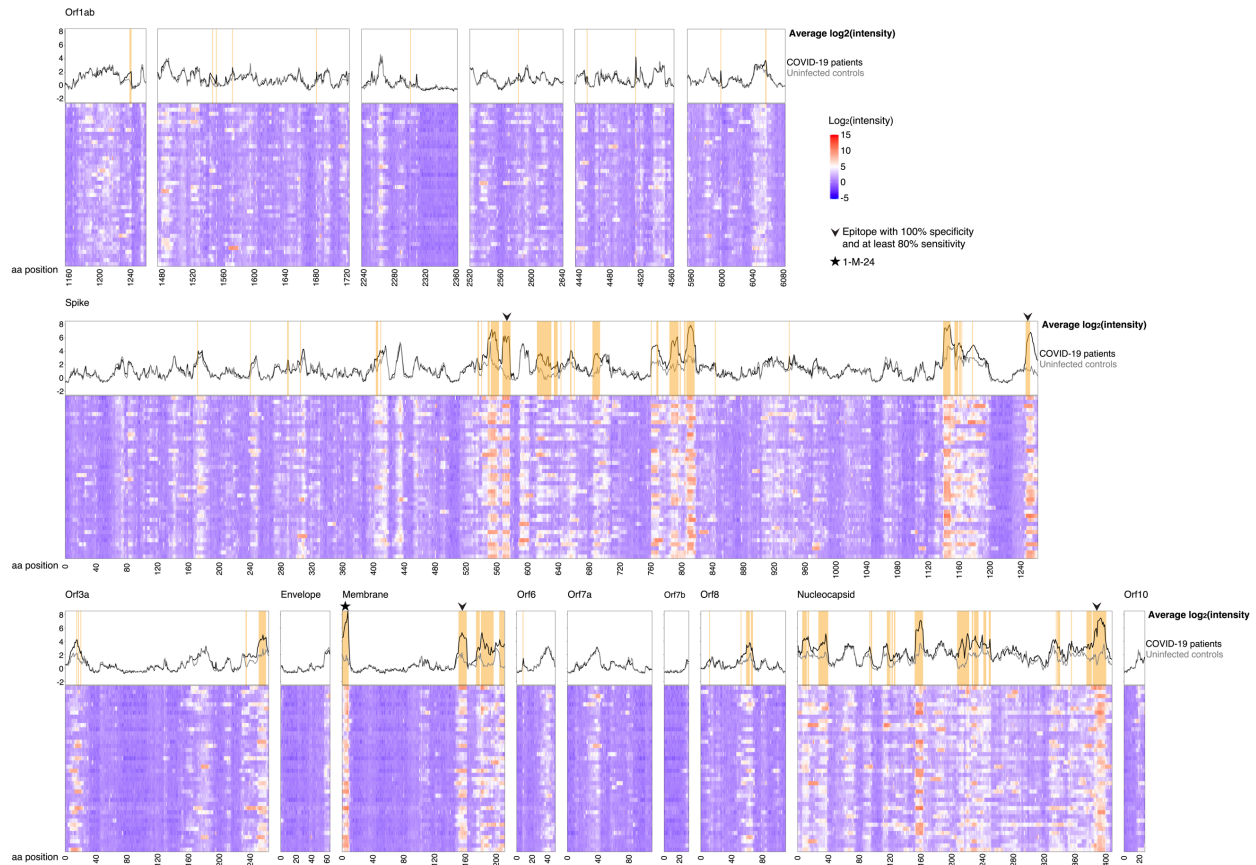

178  
179 **Figure 3. Anti-SARS-CoV-2 antibodies bind throughout the viral proteome.** Sera from 40  
180 COVID-19 convalescent subjects were assayed for IgG binding to the full SARS-CoV-2  
181 proteome on a peptide microarray. B cell epitopes were defined as peptides in which patients'  
182 average log<sub>2</sub>-normalized intensity (black lines in line plots) is 2-fold greater than controls' (gray  
183 lines in line plots) and *t*-test statistics yield adjusted *p*-values < 0.1; epitopes are identified by  
184 orange shading in the line plots.

185  
186

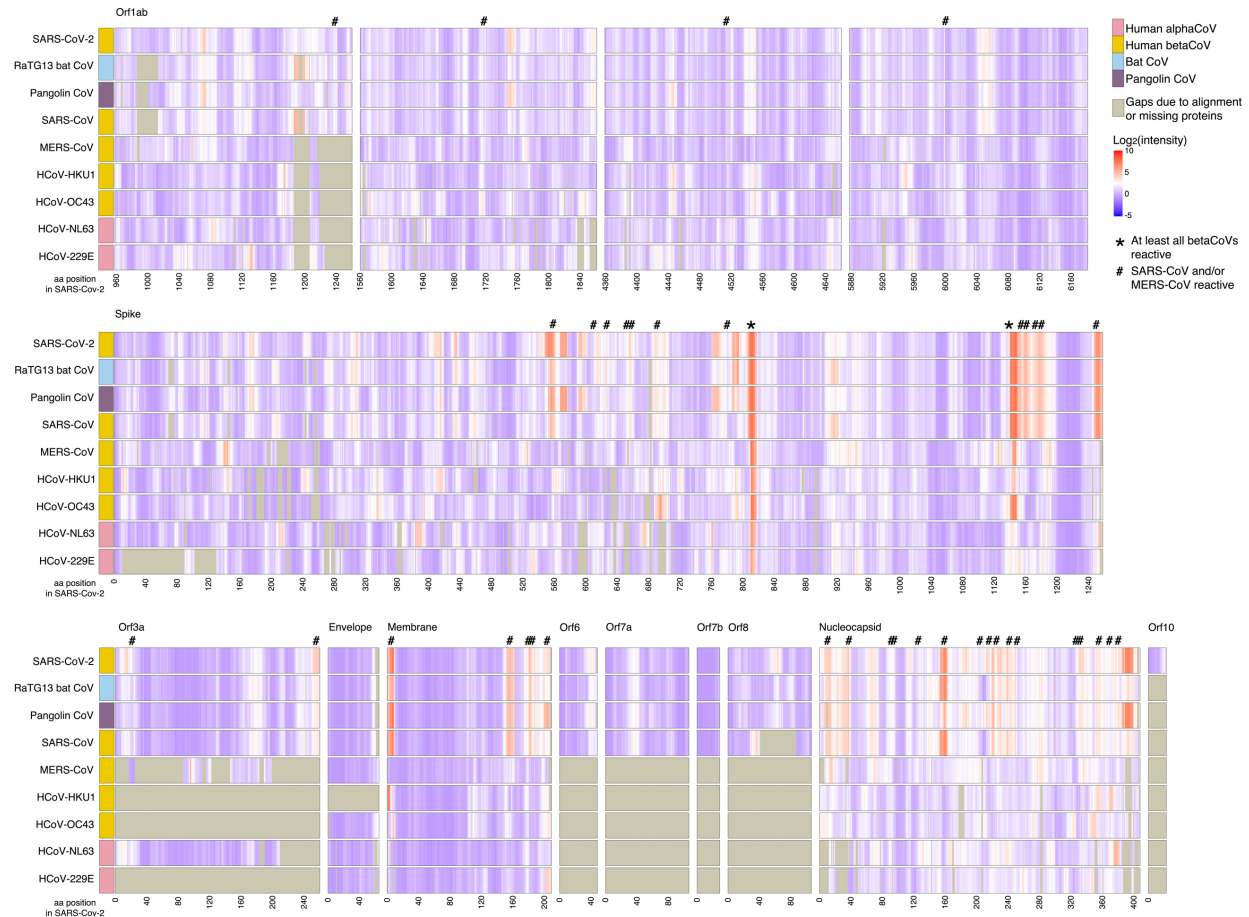

187  
 188 **Figure 4. Anti-SARS-CoV-2 antibodies cross-react with other CoVs.** Sera from 40 COVID-  
 189 19 convalescent patients were assayed for IgG binding to 9 CoVs on a peptide microarray;  
 190 averages for all 40 are shown. Viral proteins are aligned to the SARS-CoV-2 proteome; SARS-  
 191 CoV-2 amino acid (aa) position is represented on the x-axis. Regions cross-reactive across all  $\beta$ -  
 192 CoVs (\*) or cross-reactive for SARS-CoV or MERS-CoV (#) are indicated. Gray shading  
 193 indicates gaps due to alignment or lacking homologous proteins. Cross-reactive binding is  
 194 defined as peptides in which patients' average log<sub>2</sub>-normalized intensity is 2-fold greater than  
 195 controls' and *t*-test statistics yield adjusted *p*-values < 0.1.

196  
 197

### 198 Extended data

199

200 **Extended data 1.** All 40 COVID-19 convalescent patients and all 20 naïve controls reacted to  
 201 known epitopes in at least one control virus (rhinovirus and poliovirus strains).

202

203 **Extended data 2.** Percentages of the 40 COVID-19 convalescent patients and 20 naïve controls  
 204 reacted to known epitopes in at least one control virus (rhinovirus and poliovirus strains).

205

206 **Extended data 3.** B cell epitopes in the SARS-CoV-2 proteome identified by antibody binding  
 207 in 40 COVID-19 convalescent patients compared to 20 naïve controls.

208

209 **Extended data 4.** Specificity and sensitivity for past SARS-CoV-2 infection in 40 COVID-19  
210 convalescent patients compared to 20 naïve controls of individual 16-mer peptides comprising  
211 epitopes throughout the full SARS-CoV-2 proteome.

212  
213 **Extended data 5.** Epitopes paired with the 1-M-24 epitope obtained an area under the receiver  
214 operating characteristic curve (AUC-ROC) of 1.0 for SARS-CoV-2 infection in 40 COVID-19  
215 convalescent patients and 20 naïve controls using leave-one-out cross validation with linear  
216 discriminant analysis.

217  
218 **Extended data 6.** Alignment of epitopes in human and animal CoVs for which antibodies in sera  
219 from 40 COVID-19 convalescent patients showed apparent cross-reactive binding. Alignments  
220 were performed in Geneious Prime 2020.1.2 (Auckland, New Zealand).

221  
222 **Extended data 7.** Cross-reactive binding of antibodies against other CoVs in 40 COVID-19  
223 convalescent patients compared to 20 naïve controls.

224  
225 **Extended data 8.** Cross-reactive binding of antibodies in 40 COVID-19 convalescent patients  
226 compared to 20 naïve controls in protein motifs in other CoVs aligned to SARS-CoV-2.

227  
228 **Extended data 9.** B cell epitopes in the SARS-CoV-2 proteome identified by antibody binding  
229 in 40 COVID-19 convalescent patients compared to 20 naïve controls were differentiated using a  
230 cut-off of at least a 2-fold greater magnitude reactivity in patients vs controls and *t*-test statistics  
231 yielding adjusted *p*-values <0.1. Degrees of freedom, fold change, and standard deviation for  
232 each peptide are given.

233

234

## 235 **Methods**

236

### 237 **Peptide microarray design and synthesis**

238 Viral protein sequences were selected and submitted to Nimble Therapeutics (Madison, WI,  
239 USA) for development into a peptide microarray<sup>48</sup>. Sequences represented include proteomes of  
240 all seven coronaviruses known to infect humans, proteomes of closely related coronaviruses  
241 found in bats and pangolins, and spike proteins from other coronaviruses (accession numbers and  
242 replicates per peptide shown in **Supplementary Table 1**). A number of proteins were included  
243 as controls, including poliovirus, seven strains of human rhinovirus, and human cytomegalovirus  
244 65kDa phosphoprotein. We chose these controls given that we expect most human adults will  
245 have antibody reactivity to at least one of these proteins and proteomes. Accession numbers used  
246 to represent each viral protein are listed in the supplemental material (accession numbers and  
247 replicates per peptide shown in **Supplementary Table 1**). All proteins were tiled as 16 amino  
248 acid peptides overlapping by 15 amino acids. All unique peptides were tiled in a lawn of  
249 thousands of copies, with each unique peptide represented in at least 3 and up to 5 replicates  
250 (**Supplementary Table 1**). The peptide sequences were synthesized in situ with a Nimble  
251 Therapeutics Maskless Array Synthesizer (MAS) by light-directed solid-phase peptide synthesis  
252 using an amino-functionalized support (Geiner Bio-One) coupled with a 6-aminohexanoic acid  
253 linker and amino acid derivatives carrying a photosensitive 2-(2-nitrophenyl) propyloxycarbonyl  
254 (NPPOC) protection group (Orgentis Chemicals). Unique peptides were synthesized in random



255 positions on the array to minimize impact of positional bias. Each array consists of twelve  
 256 subarrays, where each subarray can process one sample and each subarray contains up to  
 257 389,000 unique peptide sequences.

258  
 259

**Supplementary Table 1. Proteins represented on the peptide microarray**

|                             | <b>Protein(s)</b>                                        | <b>GenBank accession number(s)</b> | <b>Number of replicates of each unique peptide</b> |
|-----------------------------|----------------------------------------------------------|------------------------------------|----------------------------------------------------|
| <b>Coronavirus proteins</b> | Severe acute respiratory syndrome coronavirus 2 proteome | NC_045512.2                        | 4-5                                                |
|                             | Severe acute respiratory syndrome coronavirus proteome   | NC_004718.3                        | 3                                                  |
|                             | Middle Eastern respiratory syndrome coronavirus proteome | NC_019843.3                        | 3                                                  |
|                             | Human coronavirus HKU1 proteome                          | NC_006577.2                        | 3                                                  |
|                             | Human coronavirus OC43 proteome                          | NC_006213.1                        | 3                                                  |
|                             | Human coronavirus 229E proteome                          | NC_002645.1                        | 3                                                  |
|                             | Human coronavirus NL63 proteome                          | NC_005831.2                        | 3                                                  |
|                             | Bat coronavirus (RaTG13 isolate) proteome                | MN996532.1                         | 3                                                  |
|                             | Pangolin coronavirus proteome                            | MT072864.1                         | 3                                                  |
| <b>Control proteins</b>     | Human rhinovirus A1 polyprotein                          | NC_038311.1                        | 3                                                  |
|                             | Human rhinovirus A7 polyprotein                          | DQ473503.1                         | 3                                                  |
|                             | Human rhinovirus A16 polyprotein                         | L24917.1                           | 3                                                  |
|                             | Human rhinovirus A36 polyprotein                         | JX074050.1                         | 3                                                  |

|  |                                             |            |   |
|--|---------------------------------------------|------------|---|
|  | Human rhinovirus C2 polyprotein             | EF077280.1 | 3 |
|  | Human rhinovirus C15 polyprotein            | GU219984.1 | 3 |
|  | Human rhinovirus C41 polyprotein            | KY189321.1 | 3 |
|  | Human poliovirus 1 polyprotein              | ANA67904.1 | 3 |
|  | Human cytomegalovirus 65 kDa phosphoprotein | P06725.2   | 3 |

260

## 261 **Human subjects**

262 The study was conducted in accordance with the Declaration of Helsinki and approved by the  
 263 Institutional Review Board of the University of Wisconsin-Madison. Clinical data and sera from  
 264 subjects infected with SARS-CoV-2 were obtained from the University of Wisconsin (UW)  
 265 COVID-19 Convalescent Biobank and from control subjects (sera collected prior to 2019) from  
 266 the UW Rheumatology Biobank<sup>49</sup>. All subjects were 18 years of age or older at the time of  
 267 recruitment and provided informed consent. COVID-19 convalescent subjects had a positive  
 268 SARS-COV-2 PCR test at UW Health with sera collected 5-6 weeks after self-reported COVID-  
 269 19 symptom resolution except blood was collected for one subject after 9 weeks. Age, sex,  
 270 medications, and medical problems were abstracted from UW Health's electronic medical record  
 271 (EMR). Race and ethnicity were self-reported. Hospitalization and intubation for COVID-19 and  
 272 smoking status at the time of blood collection (controls) or COVID-19 were obtained by EMR  
 273 abstraction and self-report and were in complete agreement. Two thirds of COVID-19  
 274 convalescent subjects and all controls had a primary care appointment at UW Health within 2  
 275 years of the blood draw as an indicator of the completeness of the medical information. Subjects  
 276 were considered to have an immunocompromising condition if they met any of the following  
 277 criteria: immunosuppressing medications, systemic inflammatory or autoimmune disease, cancer  
 278 not in remission, uncontrolled diabetes (secondary manifestations or hemoglobin A1c  $\geq 7.0\%$ ), or  
 279 congenital or acquired immunodeficiency. Control and COVID-19 subjects were similar in  
 280 regard to demographics and health (**Supplementary Table 2**). No subjects were current  
 281 smokers.

282

## 283 **Supplementary Table 2. Characteristics of COVID-19 Convalescent and Control Subjects**

|                         | COVID-19<br>(n=40) | Control<br>(n=20) | <i>p</i> |
|-------------------------|--------------------|-------------------|----------|
| Age, median (IQR) years | 51 (19-83)         | 55 (22-83)        | 0.378    |
| Sex, number female (%)  | 17 (42.5)          | 11 (55.0)         | 0.360    |

|                                          |           |            |       |
|------------------------------------------|-----------|------------|-------|
| Race, number (%)                         |           |            | 0.866 |
| White                                    | 34 (85.0) | 18 (90.0)  |       |
| Black                                    | 3 (7.5)   | 1 (5.0)    |       |
| Asian                                    | 3 (7.5)   | 1 (5.0)    |       |
| Native American                          | 0 (0.0)   | 0 (0.0)    |       |
| Pacific Islander                         | 0 (0.0)   | 0 (0.0)    |       |
| Ethnicity, number Hispanic (%)           | 5 (12.5)  | 1 (5.0)    | 0.361 |
| Charlson comorbidity score, median (IQR) | 2 (0, 3)  | 2 (0.5, 4) | 0.551 |
| Immunocompromised, number (%)            | 9 (22.5)  | 7 (35.0)   | 0.302 |
| COVID-19 disease severity, number (%)    |           |            |       |
| Hospitalized and intubated               | 8 (20.0)  | -          | -     |
| Hospitalized without intubation          | 7 (17.5)  | -          | -     |
| Not hospitalized                         | 25 (62.5) | -          | -     |

284

285

286

287

288 **Peptide array sample binding**

289 Samples were diluted 1:100 in binding buffer (0.01M Tris-Cl, pH 7.4, 1% alkali-soluble casein,  
290 0.05% Tween-20) and bound to arrays overnight at 4°C. After sample binding, the arrays were  
291 washed 3× in wash buffer (1× TBS, 0.05% Tween-20), 10 min per wash. Primary sample  
292 binding was detected via Alexa Fluor® 647-conjugated goat anti-human IgG secondary antibody  
293 (Jackson ImmunoResearch). The secondary antibody was diluted 1:10,000 (final concentration  
294 0.1 ng/μl) in secondary binding buffer (1x TBS, 1% alkali-soluble casein, 0.05% Tween-20).  
295 Arrays were incubated with secondary antibody for 3 h at room temperature, then washed 3× in  
296 wash buffer (10 min per wash), washed for 30 sec in reagent-grade water, and then dried by  
297 spinning in a microcentrifuge equipped with an array holder. Fluorescent signal of the secondary  
298 antibody was detected by scanning at 635 nm at 2 μm resolution using an Innopsys 910AL

299 microarray scanner. Scanned array images were analyzed with proprietary Nimble Therapeutics  
300 software to extract fluorescence intensity values for each peptide.

301

### 302 **Peptide microarray findings validation**

303 We included sequences on the array of viruses which we expected all adult humans to be likely  
304 to have been exposed to as positive controls: one poliovirus strain (measuring vaccine exposure),  
305 and seven rhinovirus strains. Any subject whose sera did not react to at least one positive control  
306 would be considered a failed run and removed from the analysis. All subjects in this analysis  
307 reacted to epitopes in at least one control strain (Fig. 1, Extended data 1, Extended data 2).

308

### 309 **Peptide microarray data analysis and data availability**

310 The raw fluorescence signal intensity values were  $\log_2$  transformed. Clusters of fluorescence  
311 intensity of statistically unlikely magnitude, indicating array defects, were identified and  
312 removed. Local and large area spatial corrections were applied, and the median transformed  
313 intensity of the peptide replicates was determined. The resulting median data was cross-  
314 normalized using quantile normalization. All peptide microarray datasets and code used in these  
315 analyses can be downloaded from [https://github.com/Ong-Research/Ong\\_UW\\_Adult\\_Covid-](https://github.com/Ong-Research/Ong_UW_Adult_Covid-19.git)  
316 [19.git](https://github.com/Ong-Research/Ong_UW_Adult_Covid-19.git).

317

### 318 **Statistical analysis**

319 Statistical analyses were performed in R (v 4.0.2) using in-house scripts. For each peptide, a  $p$ -  
320 value from a two-sided  $t$ -test with unequal variance between sets of patient and control  
321 responses were calculated and adjusted using the Benjamini-Hochberg (BH) algorithm. To  
322 determine whether the peptide was in an epitope (in SARS-CoV-2 proteins) or cross-reactive for  
323 anti-SARS-CoV-2 antibodies (in non-SARS-CoV-2 proteins), we used an adjusted  $p$ -value cutoff  
324 of  $<0.1$  (based on multiple hypothesis testing correction for all 119,487 unique sequences on the  
325 array) and a fold-change of greater than or equal to 2 and grouped consecutive peptides as a  
326 represented epitope. Linear discriminant analysis leave-one-out cross validation was used to  
327 determine specificity and sensitivity on each peptide and from each epitope using the average  
328 signal of the component peptides.

329

330 To identify cross reactive epitopes, we used each SARS-CoV-2 epitope sequence as a query,  
331 searched the database of proteins from the sequences in the peptide array using blastp (-word-  
332 size 2, num-targets 4000) to find homologous sequences in the bat, pangolin, and other human  
333 CoV strains, then determined whether the average  $\log_2$ -normalized intensity for these sequences  
334 in patients was at least 2-fold greater than in controls with  $t$ -test statistics yielding adjusted  $p$ -  
335 values  $<0.1$ . Each blast hit was then mapped back to the corresponding probe ranges.

336

337 The clinical and demographic characteristics of convalescent subjects were compared to those of  
338 the controls using  $\chi^2$  tests for categorical variables and Wilcoxon rank-sum tests for non-  
339 normally distributed continuous measures.

340

341 Heatmaps were created using the gridtext<sup>50</sup> and complexheatmap<sup>51</sup> packages in R. Alignments  
342 for heatmaps were created using MUSCLE<sup>52</sup>.

343

344

345  
346  
347  
348  
349  
350  
351  
352  
353  
354  
355  
356  
357  
358  
359  
360  
361  
362  
363  
364  
365  
366  
367  
368  
369  
370  
371  
372  
373  
374  
375  
376  
377  
378  
379  
380  
381  
382  
383  
384  
385  
386  
387  
388

## **Funding**

I.M.O. acknowledges support by the Clinical and Translational Science Award (CTSA) program, through the NIH National Center for Advancing Translational Sciences (NCATS), grants UL1TR002373 and KL2TR002374. This research was also supported by 2U19AI104317-06 (to I.M.O.) and R24OD017850 (to D.H.O.) from the National Institute of Allergy and Infectious Diseases of the National Institutes of Health ([www.niaid.nih.gov](http://www.niaid.nih.gov)). A.S.H. has been supported by NRSA award T32 AI007414 and M.F.A. by T32 AG000213. S.J.M. acknowledges support by the National Cancer Institute, NIH and UW Carbone Comprehensive Cancer Center's Cancer Informatics Shared Resource (grant P30-CA-14520). This project was also funded through a COVID-19 Response Grant from the Wisconsin Partnership Program and the University of Wisconsin School of Medicine and Public Health (to M.A.S.), startup funds through the University of Wisconsin Department of Obstetrics and Gynecology (I.M.O.), and the Data Science Initiative grant from the University of Wisconsin-Madison Office of the Chancellor and the Vice Chancellor for Research and Graduate Education (with funding from the Wisconsin Alumni Research Foundation) (I.M.O.).

## **Acknowledgments**

The authors are grateful to Dr. Christina Newman, Dr. Nathan Sherer, Dr. Thomas Friedrich, Dr. Amelia Haj, Dr. James Gern, Dr. Christine Seroogy, and Gage Moreno for their thoughtful comments and helpful discussions in preparing this manuscript.

## **Author contributions**

A.S.H., S.J.M., D.A.B., M.F.A., M.A.S., D.H.O. and I.M.O. conceptualized this study. A.S.H., D.A.B., and I.M.O. created the array design. M.F.A. and M.A.S. selected patient and control samples. A.S.H., M.F.A., and M.A.S. collected patient demographics and characteristics by medical record chart review. A.S.H., S.J.M., D.A.B., S.K., and I.M.O. performed data normalizations, analyses, and validations, and created graphical data visualizations. A.S.H., S.J.M., D.A.B., A.K.S., and I.M.O. performed formal statistical analyses. S.J.M., D.A.B., and I.M.O. wrote the custom software scripts used. A.S.H. wrote the original draft of the manuscript with input from D.H.O. and I.M.O.. A.S.H., S.J.M., D.A.B., M.F.A., and I.M.O. wrote sections of the methods. All authors contributed to review and editing.

The authors declare the following competing interests: A.S.H., S.J.M., D.A.B., M.F.A., S.K., M.A.S., D.H.O., and I.M.O. are listed as the inventors on a patent filed that is related to findings in this study. Application: 63/080568, 63/083671. Title: IDENTIFICATION OF SARS-COV-2 EPITOPES DISCRIMINATING COVID-19 INFECTION FROM CONTROL AND METHODS OF USE. Application type: Provisional. Status: Filed. Country: United States. Filing date: September 18, 2020, September 25, 2020.

## **References:**

1. Deeks, J. J. et al. Antibody tests for identification of current and past infection with SARS-CoV-2. *Cochrane Database Syst Rev* **6**, CD013652 (2020).



- 389 2. Liu, W. et al. Evaluation of Nucleocapsid and Spike Protein-Based Enzyme-Linked  
390 Immunosorbent Assays for Detecting Antibodies against SARS-CoV-2. *J Clin Microbiol*  
391 **58**, (2020).
- 392 3. Tré-Hardy, M. et al. Analytical and clinical validation of an ELISA for specific SARS-  
393 CoV-2 IgG, IgA, and IgM antibodies. *J Med Virol* (2020).
- 394 4. Lisboa Bastos, M. et al. Diagnostic accuracy of serological tests for covid-19: systematic  
395 review and meta-analysis. *BMJ* **370**, m2516 (2020).
- 396 5. Ayouba, A. et al. Multiplex detection and dynamics of IgG antibodies to SARS-CoV2 and  
397 the highly pathogenic human coronaviruses SARS-CoV and MERS-CoV. *J Clin Virol* **129**,  
398 104521 (2020).
- 399 6. Huang, Y., Yang, C., Xu, X. F., Xu, W. & Liu, S. W. Structural and functional properties  
400 of SARS-CoV-2 spike protein: potential antiviral drug development for COVID-19. *Acta*  
401 *Pharmacol Sin* **41**, 1141-1149 (2020).
- 402 7. Chen, W. Promise and challenges in the development of COVID-19 vaccines. *Hum Vaccin*  
403 *Immunother* 1-5 (2020).
- 404 8. Ong, E., Wong, M. U., Huffman, A. & He, Y. COVID-19 Coronavirus Vaccine Design  
405 Using Reverse Vaccinology and Machine Learning. *Front Immunol* **11**, 1581 (2020).
- 406 9. Chow, S. C. et al. Specific epitopes of the structural and hypothetical proteins elicit  
407 variable humoral responses in SARS patients. *J Clin Pathol* **59**, 468-476 (2006).
- 408 10. He, Y., Zhou, Y., Siddiqui, P., Niu, J. & Jiang, S. Identification of immunodominant  
409 epitopes on the membrane protein of the severe acute respiratory syndrome-associated  
410 coronavirus. *J Clin Microbiol* **43**, 3718-3726 (2005).
- 411 11. Pang, H. et al. Protective humoral responses to severe acute respiratory syndrome-  
412 associated coronavirus: implications for the design of an effective protein-based vaccine. *J*  
413 *Gen Virol* **85**, 3109-3113 (2004).
- 414 12. Sui, J. et al. Potent neutralization of severe acute respiratory syndrome (SARS) coronavirus  
415 by a human mAb to S1 protein that blocks receptor association. *Proc Natl Acad Sci U S A*  
416 **101**, 2536-2541 (2004).
- 417 13. ter Meulen, J. et al. Human monoclonal antibody as prophylaxis for SARS coronavirus  
418 infection in ferrets. *Lancet* **363**, 2139-2141 (2004).
- 419 14. Rockx, B. et al. Structural basis for potent cross-neutralizing human monoclonal antibody  
420 protection against lethal human and zoonotic severe acute respiratory syndrome  
421 coronavirus challenge. *J Virol* **82**, 3220-3235 (2008).
- 422 15. Martin, J. E. et al. A SARS DNA vaccine induces neutralizing antibody and cellular  
423 immune responses in healthy adults in a Phase I clinical trial. *Vaccine* **26**, 6338-6343  
424 (2008).
- 425 16. Jiang, L. et al. Potent neutralization of MERS-CoV by human neutralizing monoclonal  
426 antibodies to the viral spike glycoprotein. *Sci Transl Med* **6**, 234ra59 (2014).
- 427 17. Chen, Z. et al. Human Neutralizing Monoclonal Antibody Inhibition of Middle East  
428 Respiratory Syndrome Coronavirus Replication in the Common Marmoset. *J Infect Dis*  
429 **215**, 1807-1815 (2017).
- 430 18. Burton, D. R. & Walker, L. M. Rational Vaccine Design in the Time of COVID-19. *Cell*  
431 *Host Microbe* **27**, 695-698 (2020).
- 432 19. Zhou, Y., Jiang, S. & Du, L. Prospects for a MERS-CoV spike vaccine. *Expert Rev*  
433 *Vaccines* **17**, 677-686 (2018).

- 434 20. Maier, H. J., Bickerton, E. & Britton, P. *Coronaviruses : methods and protocols* (Humana  
435 Press; Springer, New York, 2015).
- 436 21. Liu, L. et al. Anti-spike IgG causes severe acute lung injury by skewing macrophage  
437 responses during acute SARS-CoV infection. *JCI Insight* **4**, (2019).
- 438 22. Lee, W. S., Wheatley, A. K., Kent, S. J. & DeKosky, B. J. Antibody-dependent  
439 enhancement and SARS-CoV-2 vaccines and therapies. *Nat Microbiol* (2020).
- 440 23. Takano, T., Kawakami, C., Yamada, S., Satoh, R. & Hohdatsu, T. Antibody-dependent  
441 enhancement occurs upon re-infection with the identical serotype virus in feline infectious  
442 peritonitis virus infection. *J Vet Med Sci* **70**, 1315-1321 (2008).
- 443 24. Morens, D. M. & Fauci, A. S. Emerging Pandemic Diseases: How We Got to COVID-19.  
444 *Cell* **182**, 1077-1092 (2020).
- 445 25. Tseng, C. T. et al. Immunization with SARS coronavirus vaccines leads to pulmonary  
446 immunopathology on challenge with the SARS virus. *PLoS One* **7**, e35421 (2012).
- 447 26. Jaume, M. et al. SARS CoV subunit vaccine: antibody-mediated neutralisation and  
448 enhancement. *Hong Kong Med J* **18 Suppl 2**, 31-36 (2012).
- 449 27. Tian, X. et al. Potent binding of 2019 novel coronavirus spike protein by a SARS  
450 coronavirus-specific human monoclonal antibody. *Emerg Microbes Infect* **9**, 382-385  
451 (2020).
- 452 28. Lv, H. et al. Cross-reactive Antibody Response between SARS-CoV-2 and SARS-CoV  
453 Infections. *Cell Rep* **31**, 107725 (2020).
- 454 29. Pinto, D. et al. Cross-neutralization of SARS-CoV-2 by a human monoclonal SARS-CoV  
455 antibody. *Nature* **583**, 290-295 (2020).
- 456 30. Nickbakhsh, S. et al. Epidemiology of Seasonal Coronaviruses: Establishing the Context  
457 for the Emergence of Coronavirus Disease 2019. *J Infect Dis* **222**, 17-25 (2020).
- 458 31. Gorse, G. J., Patel, G. B., Vitale, J. N. & O'Connor, T. Z. Prevalence of antibodies to four  
459 human coronaviruses is lower in nasal secretions than in serum. *Clin Vaccine Immunol* **17**,  
460 1875-1880 (2010).
- 461 32. Premkumar, L. et al. The receptor binding domain of the viral spike protein is an  
462 immunodominant and highly specific target of antibodies in SARS-CoV-2 patients. *Sci*  
463 *Immunol* **5**, (2020).
- 464 33. Poh, C. M. et al. Two linear epitopes on the SARS-CoV-2 spike protein that elicit  
465 neutralising antibodies in COVID-19 patients. *Nat Commun* **11**, 2806 (2020).
- 466 34. Zhang, B. Z. et al. Mining of epitopes on spike protein of SARS-CoV-2 from COVID-19  
467 patients. *Cell Res* **30**, 702-704 (2020).
- 468 35. Li, Y. et al. Linear epitopes of SARS-CoV-2 spike protein elicit neutralizing antibodies in  
469 COVID-19 patients. *Cell Mol Immunol* **17**, 1095-1097 (2020).
- 470 36. Grifoni, A. et al. A Sequence Homology and Bioinformatic Approach Can Predict  
471 Candidate Targets for Immune Responses to SARS-CoV-2. *Cell Host Microbe* **27**, 671-  
472 680.e2 (2020).
- 473 37. Ahmed, S. F., Quadeer, A. A. & McKay, M. R. Preliminary Identification of Potential  
474 Vaccine Targets for the COVID-19 Coronavirus (SARS-CoV-2) Based on SARS-CoV  
475 Immunological Studies. *Viruses* **12**, (2020).
- 476 38. Crooke, S. N., Ovsyannikova, I. G., Kennedy, R. B. & Poland, G. A. Immunoinformatic  
477 identification of B cell and T cell epitopes in the SARS-CoV-2 proteome. *Sci Rep* **10**,  
478 14179 (2020).

- 479 39. Zhou, P. et al. A pneumonia outbreak associated with a new coronavirus of probable bat  
480 origin. *Nature* **579**, 270-273 (2020).
- 481 40. Ge, X. Y. et al. Coexistence of multiple coronaviruses in several bat colonies in an  
482 abandoned mineshaft. *Virology* **31**, 31-40 (2016).
- 483 41. Xiao, K. et al. Isolation of SARS-CoV-2-related coronavirus from Malayan pangolins.  
484 *Nature* **583**, 286-289 (2020).
- 485 42. Tang, T., Bidon, M., Jaimes, J. A., Whittaker, G. R. & Daniel, S. Coronavirus membrane  
486 fusion mechanism offers a potential target for antiviral development. *Antiviral Res* **178**,  
487 104792 (2020).
- 488 43. Shi, S. Q. et al. The expression of membrane protein augments the specific responses  
489 induced by SARS-CoV nucleocapsid DNA immunization. *Mol Immunol* **43**, 1791-1798  
490 (2006).
- 491 44. Shrock, E. et al. Viral epitope profiling of COVID-19 patients reveals cross-reactivity and  
492 correlates of severity. *Science* (2020).
- 493 45. Mishra, N. et al. Immunoreactive peptide maps of SARS-CoV-2 and other human  
494 coronaviruses. *bioRxiv*  
495 <https://www.biorxiv.org/content/10.1101/2020.08.13.249953v1.full.pdf> (2020).
- 496 46. Woo, P. C., Lau, S. K., Huang, Y. & Yuen, K. Y. Coronavirus diversity, phylogeny and  
497 interspecies jumping. *Exp Biol Med (Maywood)* **234**, 1117-1127 (2009).
- 498 47. Anthony, S. J. et al. Global patterns in coronavirus diversity. *Virus Evol* **3**, vex012 (2017).
- 499 48. Heffron, A. S. et al. Antibody responses to Zika virus proteins in pregnant and non-  
500 pregnant macaques. *PLoS Negl Trop Dis* **12**, e0006903 (2018).
- 501 49. Holmes, C. L. et al. Reduced IgG titers against pertussis in rheumatoid arthritis: Evidence  
502 for a citrulline-biased immune response and medication effects. *PLoS One* **14**, e0217221  
503 (2019).
- 504 50. Wilke, C. O. gridtext: Improved Text Rendering Support for 'Grid' Graphics. R package  
505 version 0.1.1. (2020).
- 506 51. Gu, Z., Eils, R. & Schlesner, M. Complex heatmaps reveal patterns and correlations in  
507 multidimensional genomic data. *Bioinformatics* **32**, 2847-2849 (2016).
- 508 52. Edgar, R. C. MUSCLE: multiple sequence alignment with high accuracy and high  
509 throughput. *Nucleic Acids Res* **32**, 1792-1797 (2004).
- 510
